# Supplementary material
Source: MDPI journal article supplement (https://www.mdpi.com/2072-666X/6/2/239)
Supplement: s1 [file s1]

## Supplementary Materials

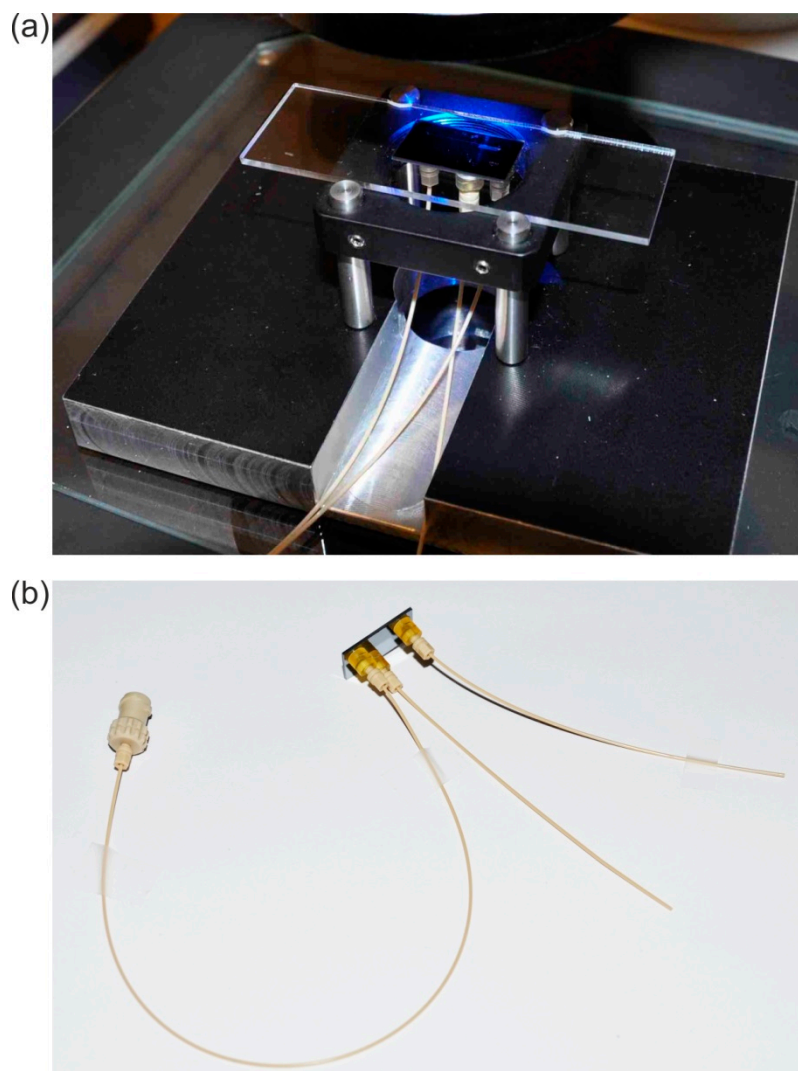

**Figure S1.** (a) Experimental setup showing the microfluidic chip mounted under the microscope; (b) world-to-chip interface: Bonded port connectors (Labsmith CapTite, Virum, Denmark) glued onto the backside of the silicon device, screwed-in one-piece fittings (Labsmith CapTite) connect the PEEK tubing with bonded port connector and Luer-Lock™ adapter (Labsmith CapTite).

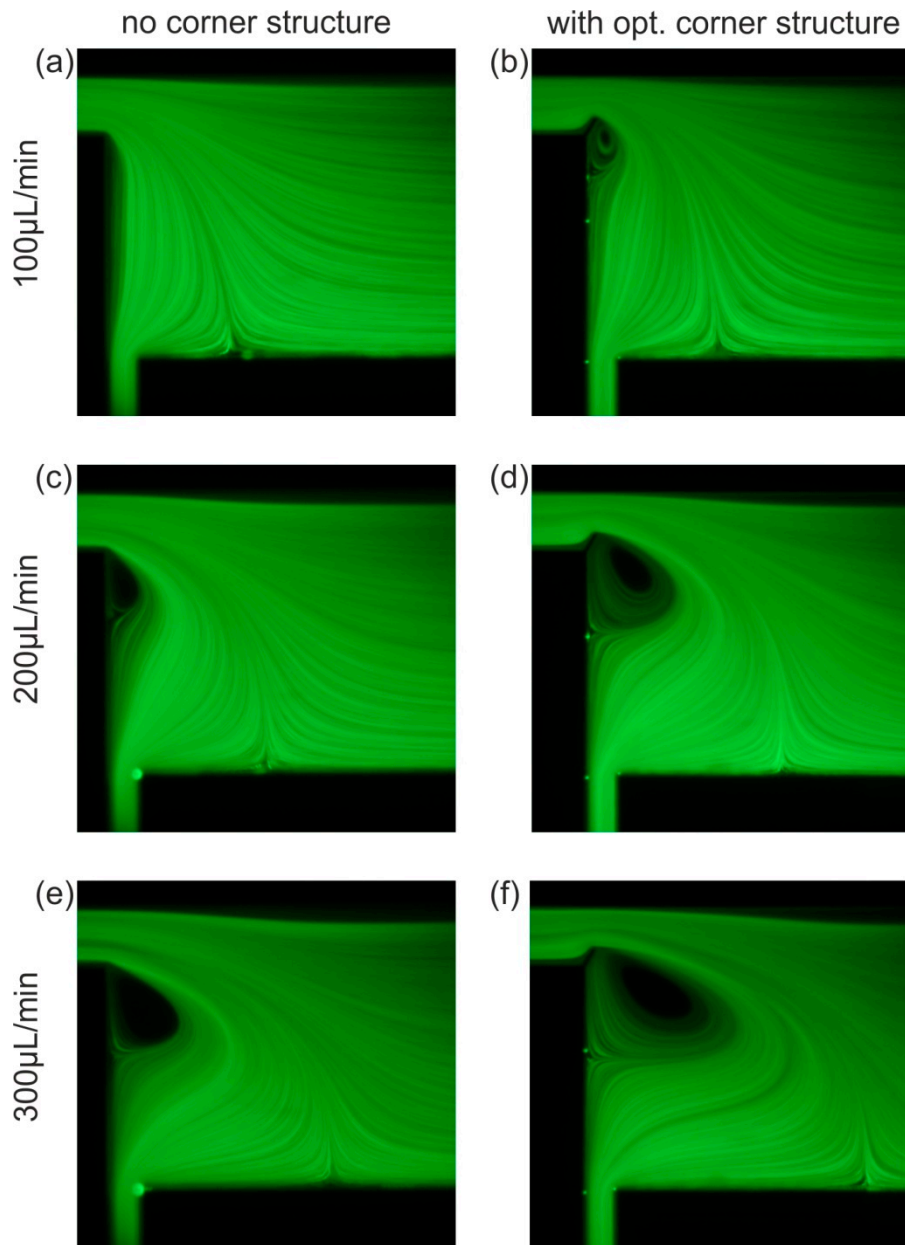

**Figure S2.** Comparison of fluorescent particle streamline micrographs at (a,b) 100  $\mu\text{L}/\text{min}$ , (c,d) 200  $\mu\text{L}/\text{min}$ , (e,f) 300  $\mu\text{L}/\text{min}$ . The left column shows a plain backward-facing step channel (step height  $h = 400 \mu\text{m}$ ), whereas the right column shows a sudden expansion channel featuring the optimized corner structure (step height  $h = 400 \mu\text{m}$ ,  $\alpha = -30^\circ$ ).
